# Supplementary material for: Trivial positional isomerism in ligands triggering different properties in Fe(ii)-metallopolymers; design, synthesis, and characterization
Source: Royal Society of Chemistry journal article supplement (doi:10.1039/d4dt02175d), 2024-01-01
Supplement: d4dt02175d1.pdf [file d4dt02175d1.pdf]

Supporting Information

Trivial Positional Isomerism in Ligands Triggering Different Properties in Fe(II)-Metallopolymers;  
Design, Synthesis, and Characterization

Shubham Bawa,<sup>a</sup> Anil Kumar,<sup>a, b</sup> Gaurav Kumar Nim,<sup>c</sup> Jayanta Bera,<sup>d</sup> Samareesh Ghosh,<sup>a</sup> Satyajit Sahu,<sup>d</sup>  
Prasenjit Kar,<sup>c</sup> Anasuya Bandyopadhyay\*,<sup>a</sup>

<sup>a</sup>Department of Polymer & Process Engineering, IIT Roorkee, Saharanpur Campus, Saharanpur-247001, India

<sup>b</sup>Department of Food & Nutrition, Kunsan National University, Gunsan-54150, South Korea

<sup>c</sup>Department of Chemistry, IIT Roorkee, Roorkee-247667, India

<sup>d</sup>Department of Physics, IIT Jodhpur, Rajasthan-342037, India

| <b>Table of Contents</b>                                                                                                                      | <b>Page No.</b> |
|-----------------------------------------------------------------------------------------------------------------------------------------------|-----------------|
| 1. $^{13}\text{C}$ -NMR spectrum of Ligand $\text{L}_1$ and HRMS of Ligand $\text{L}_1$                                                       | S3              |
| 2. $^{13}\text{C}$ -NMR spectrum of Ligand $\text{L}_2$ and HRMS of Ligand $\text{L}_2$                                                       | S4              |
| 3. $^1\text{H}$ -NMR spectrum of Ligands, $\text{Fe(II)}$ -poly and schematic their coordination                                              | S5              |
| 4. Molecular Weight of $\text{Fe(II)}\text{-L}_1$ poly and Thermal analysis                                                                   | S5              |
| 5. Molecular Weight of $\text{Fe(II)}\text{-L}_2$ poly and Thermal analysis                                                                   | S7              |
| 6. Cyclic voltammetry of Ligand $\text{L}_1$ and Ligand $\text{L}_2$                                                                          | S8              |
| 7. Repeatable Cyclic voltammetry of $\text{Fe(II)}\text{-L}_1$ and $\text{Fe(II)}\text{-L}_2$ Poly                                            | S9              |
| 8. Conductivity Experiment and Counter-ion detection of $\text{Fe(II)}\text{-L}_1$ and $\text{Fe(II)}\text{-L}_2$ poly                        | S11             |
| 9. DRS of Ligand $\text{L}_1$ and Ligand $\text{L}_2$                                                                                         | S12             |
| 10. XPS of $\text{Fe(II)}\text{-L}_1$ and $\text{Fe(II)}\text{-L}_2$ poly                                                                     | S12             |
| 11. Spectroelectrochemical studies upon sequential voltage increase of<br>$\text{Fe(II)}\text{-L}_1$ poly and $\text{Fe(II)}\text{-L}_2$ poly | S14             |
| 12. Effect of mass loading and scan rate on capacitance value of $\text{Fe(II)}\text{-L}_1$ poly<br>and $\text{Fe(II)}\text{-L}_2$ poly       | S14             |

1.  $^{13}\text{C}$ -NMR spectrum of Ligand  $\text{L}_1$  and HRMS of Ligand  $\text{L}_1$

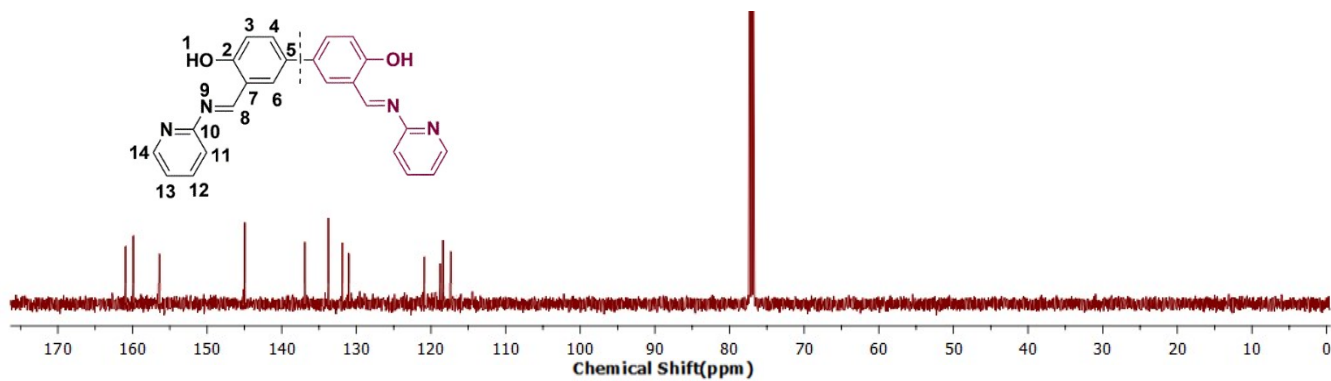

Figure .S-1.  $^{13}\text{C}$ -NMR spectrum (125 MHz,  $\text{CDCl}_3$ ) of Ligand  $\text{L}_1$

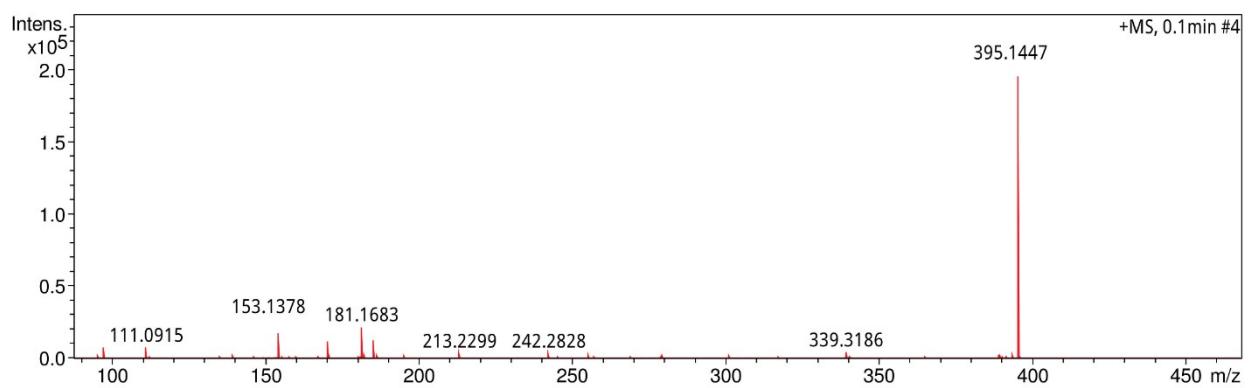

Figure .S-2. HRMS of Ligand  $\text{L}_1$

## 2. $^{13}\text{C}$ -NMR spectrum of Ligand $\text{L}_2$ and HRMS of Ligand $\text{L}_2$

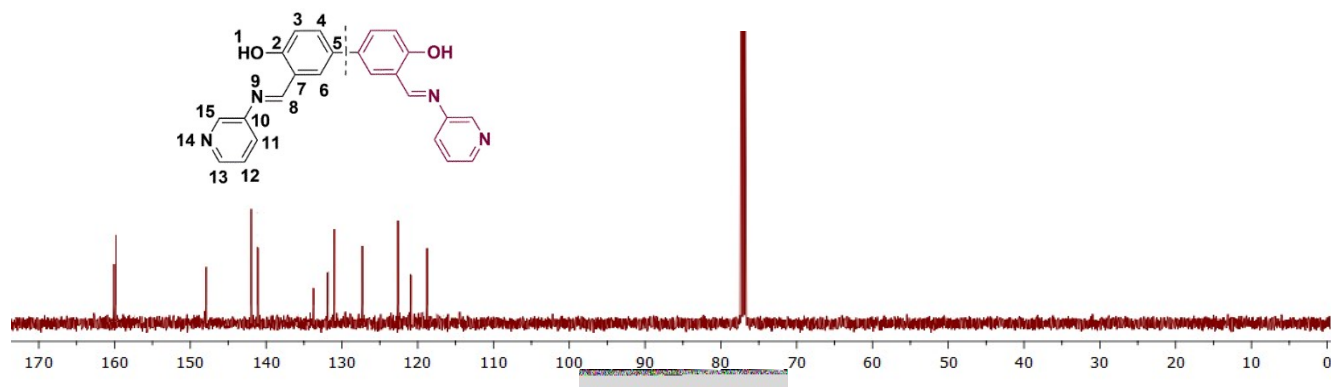

Figure .S-3.  $^{13}\text{C}$ -NMR (125 MHz,  $\text{CDCl}_3$ ) spectrum of Ligand  $\text{L}_2$

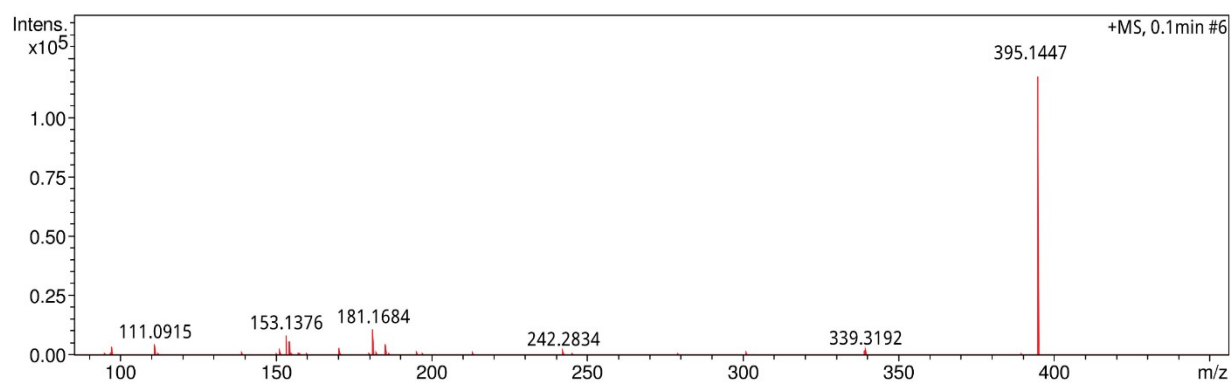

Figure .S-4. HRMS of Ligand  $\text{L}_2$

### 3. $^1\text{H}$ -NMR spectrum of Ligands, Fe(II)-poly and schematic their coordination

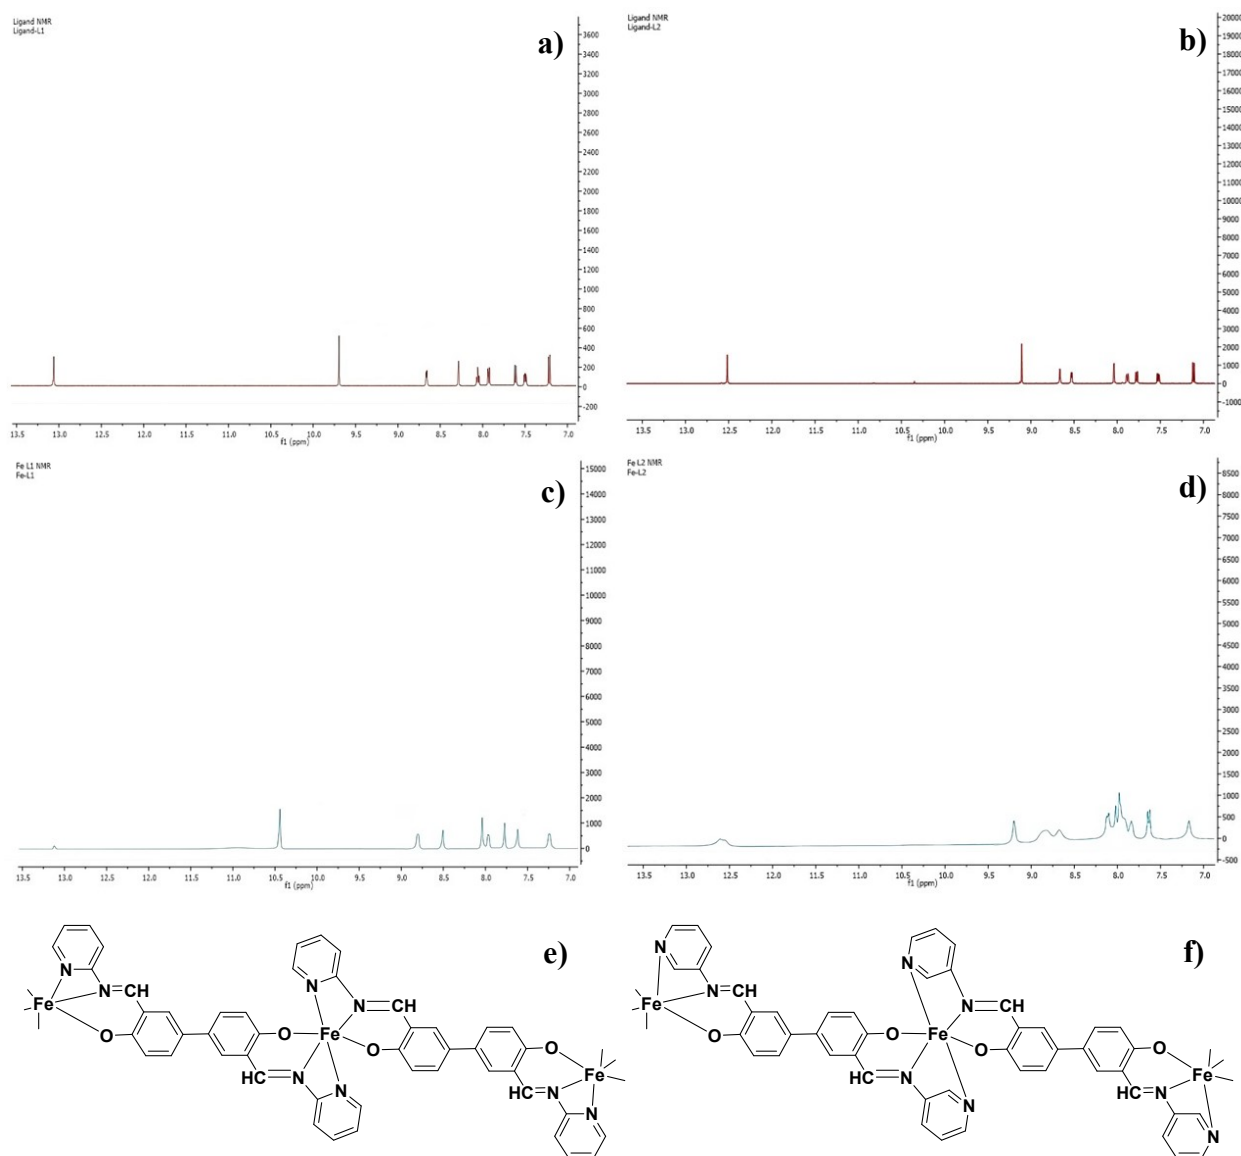

Figure .S-5.  $^1\text{H}$  NMR spectra of a) Ligand  $\text{L}_1$  b) Fe(II)- $\text{L}_1$  poly c) Ligand  $\text{L}_2$  and d) Fe(II)- $\text{L}_2$  poly and schematic coordination of e) Fe(II)- $\text{L}_1$  poly f) Fe(II)- $\text{L}_2$  poly

### 4. Molecular Weight of Fe(II)- $\text{L}_1$ poly and Thermal analysis

#### Molecular Weight determination:

The Static light scattering (SLS) technique was used to determine the Weight Average molecular weight of the Fe(II)- $\text{L}_1$  poly and Fe(II)- $\text{L}_2$  poly. For both polymers, two different stock solutions were prepared by dissolving 15 mg of polymer in 30 ml of THF that were then filtered through a 0.2-micron Nylon filter to remove solid particles to obtain a homogeneous solution. Then six different concentration solutions were prepared from this stock solution with filtered THF solvent used as dilution. Both the polymers were analyzed at different angles by SLS technique gives the  $(3.7 \pm 0.8) \times 10^4$  g/ mol for Fe(II)-  $\text{L}_1$  poly (Fig-S-6) and  $(4.04 \pm 0.8) \times 10^4$  g/ mol for Fe(II)-  $\text{L}_2$  Poly (Fig-S-8) shown in Berry plot.

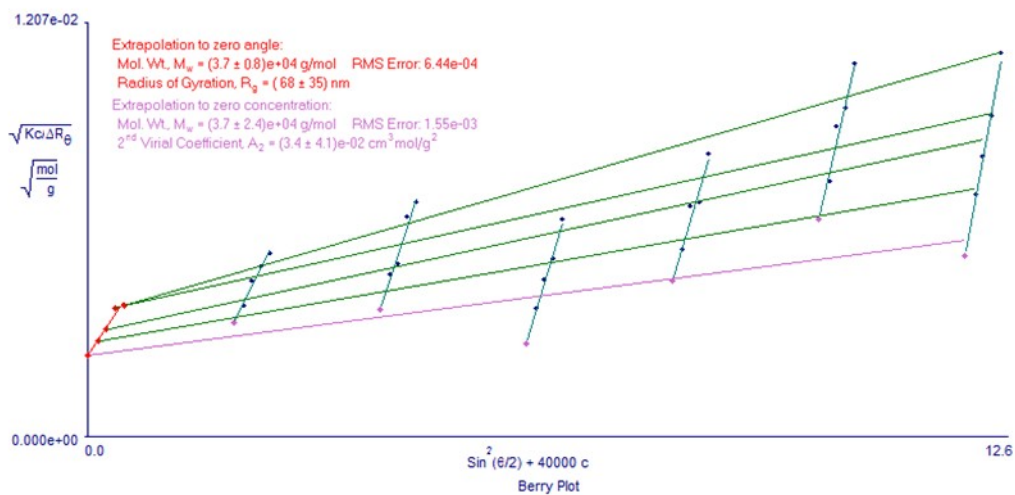

Figure .S-6. Berry Plot of Fe (II)-L<sub>1</sub> poly in batch mode (THF solution)

## Thermal analysis

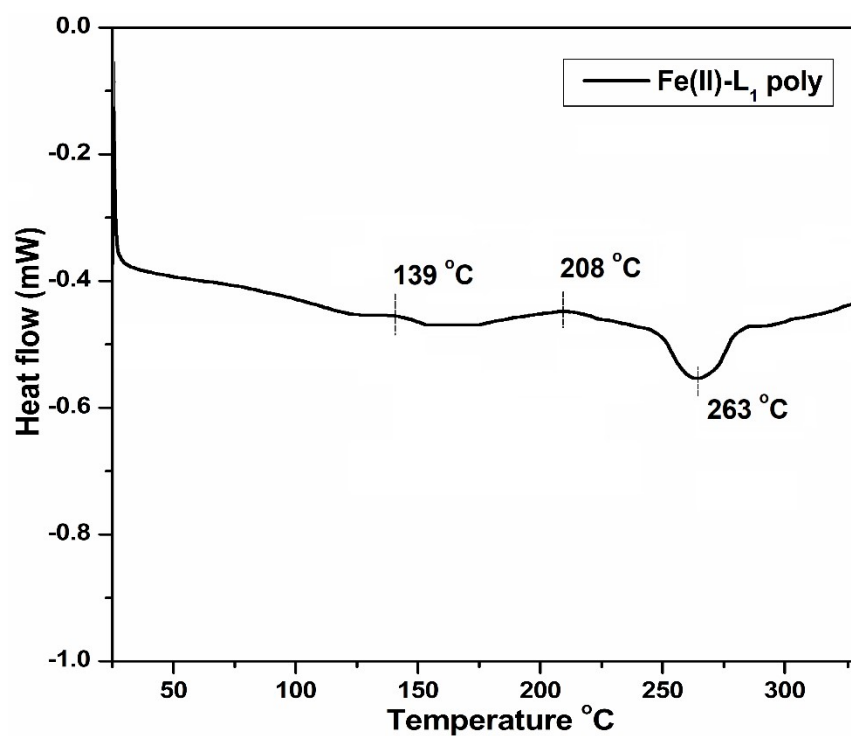

Figure .S-7. DSC Thermogram of Fe(II)-L<sub>1</sub> poly

## 5. Molecular Weight of Fe(II)-L<sub>2</sub> poly and Thermal analysis

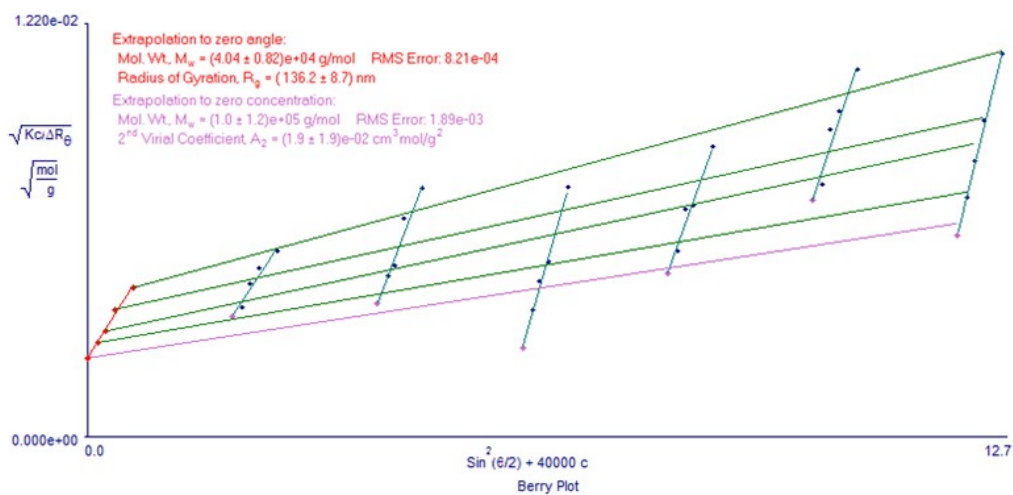

Figure .S-8. Berry Plot of Fe (II)-L<sub>2</sub> poly in batch mode with a solution prepared in THF

## Thermal Analysis:

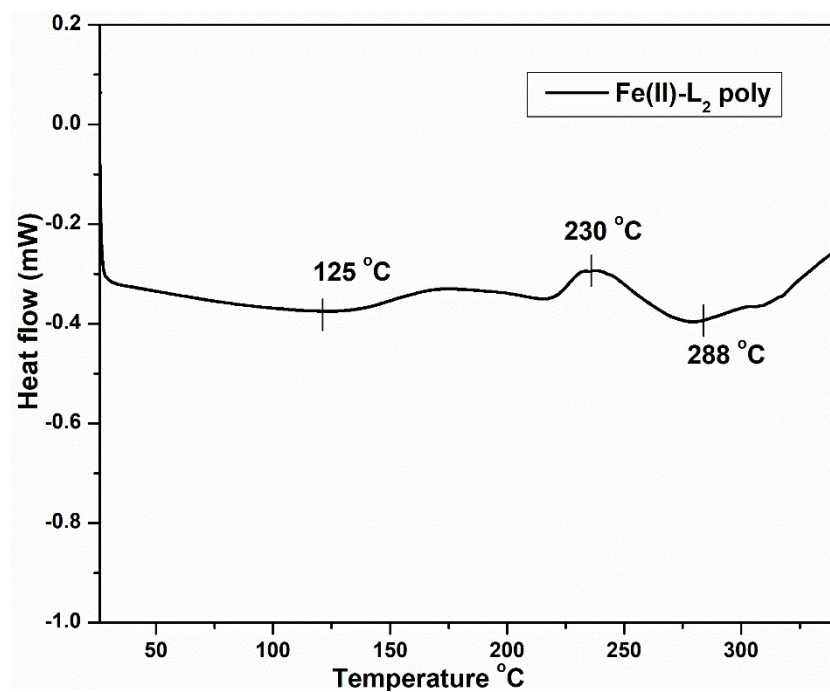

Figure .S-9. DSC Thermogram of Fe(II)-L<sub>2</sub> poly

## 6. Cyclic voltammetry of Ligand L<sub>1</sub> and Ligand L<sub>2</sub>

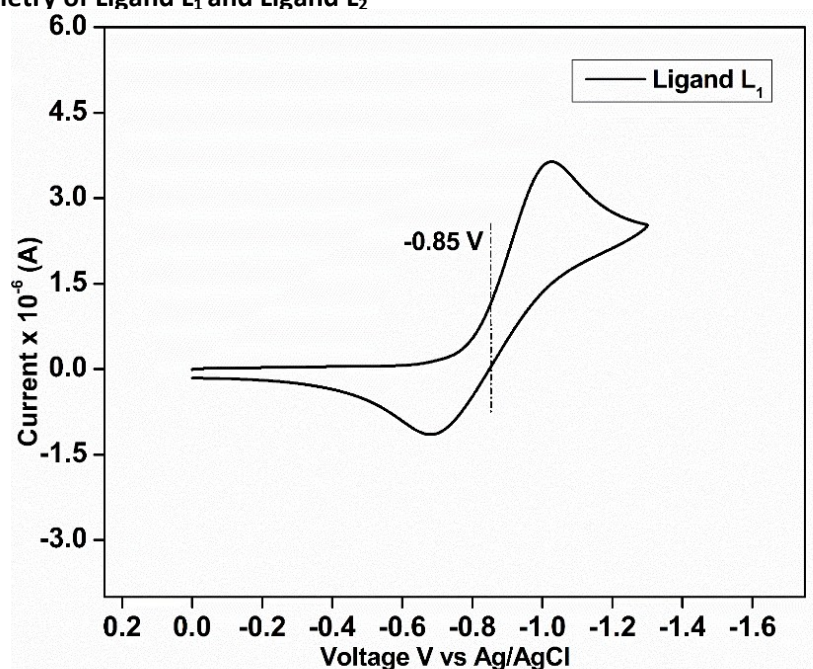

Figure .S-10. Cyclic Voltammogram of Ligand L<sub>1</sub> in dichloromethane containing 0.1 M TBAP at 100mV/s with Glassy Carbon working electrode and Ag/AgCl reference electrode

The Cyclic voltammogram of the ligand L<sub>1</sub> is shown in Figure .S-10. Ligands do not generally show any oxidation response. A reduction peak at -0.85 V was observed, corresponding to the reduction of the imine bond.

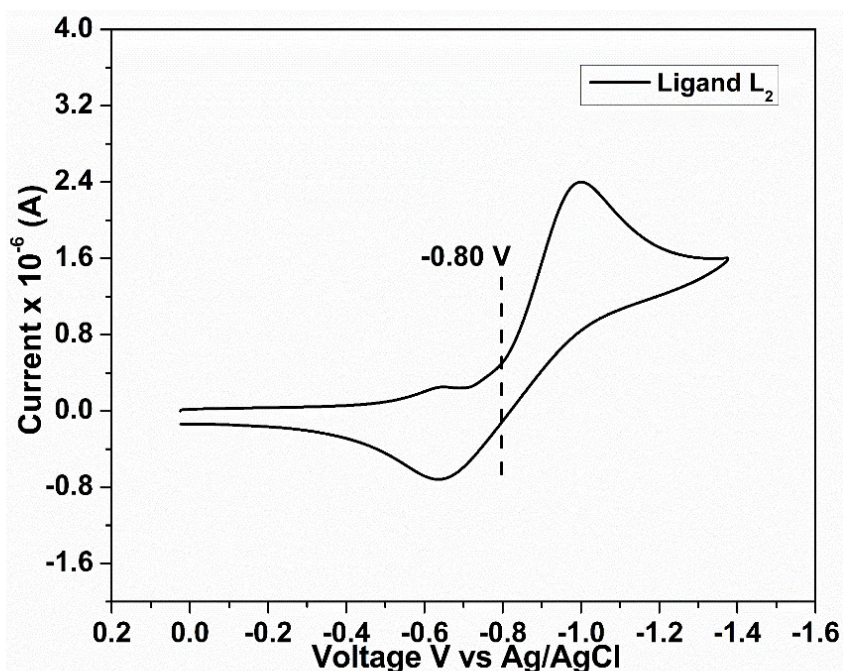

Figure .S-11. Cyclic Voltammogram of ligand  $L_2$  in dichloromethane containing 0.1 M TBAP at 100mV/s with Glassy Carbon working electrode and Ag/AgCl reference electrode

Similarly, the cyclic voltammogram of the Ligand  $L_2$  is shown in Figure .S-11. A reduction response at -0.80 V was observed, corresponding to the reduction of imine bonds.

### 7. Repeatable Cyclic voltammetry of Fe(II)- $L_1$ and Fe(II)- $L_2$ Poly

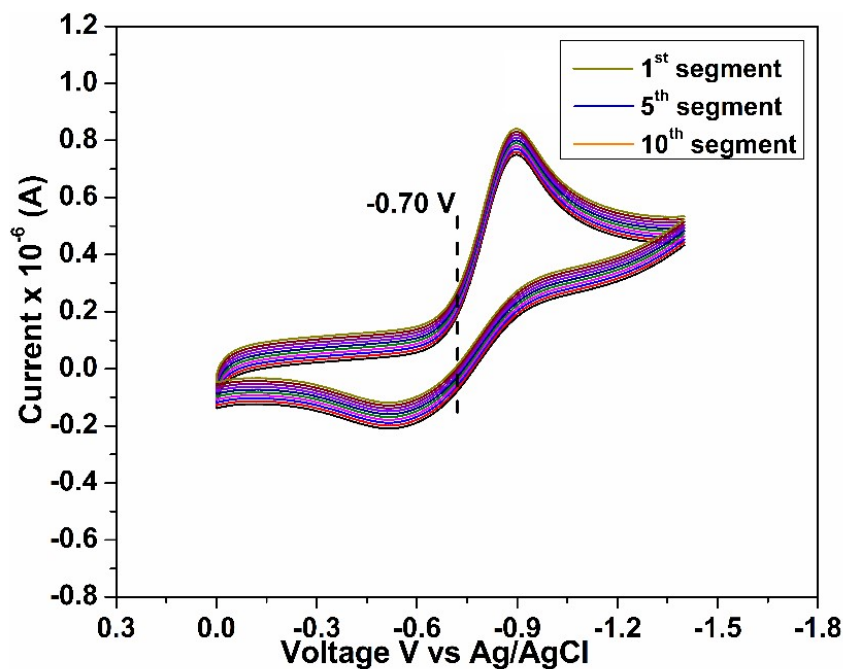

Figure .S-12. 10 segment reduction Cyclic Voltammogram of Fe(II)- $L_1$  poly

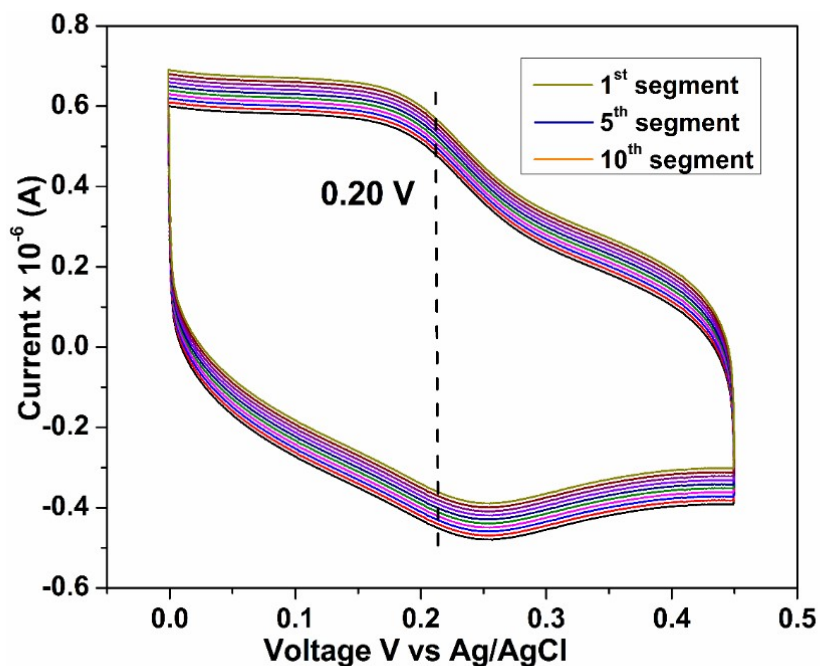

Figure .S-13. 10 segment oxidation Cyclic Voltammogram of Fe(II)- $L_1$  poly

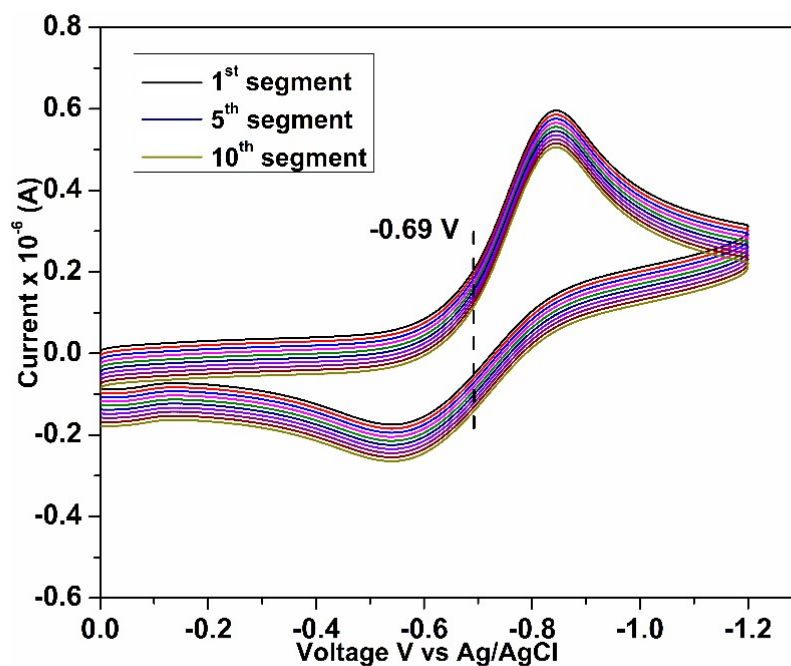

Figure .S-14. 10 segment reduction Cyclic Voltammogram of Fe(II)-L<sub>2</sub> poly

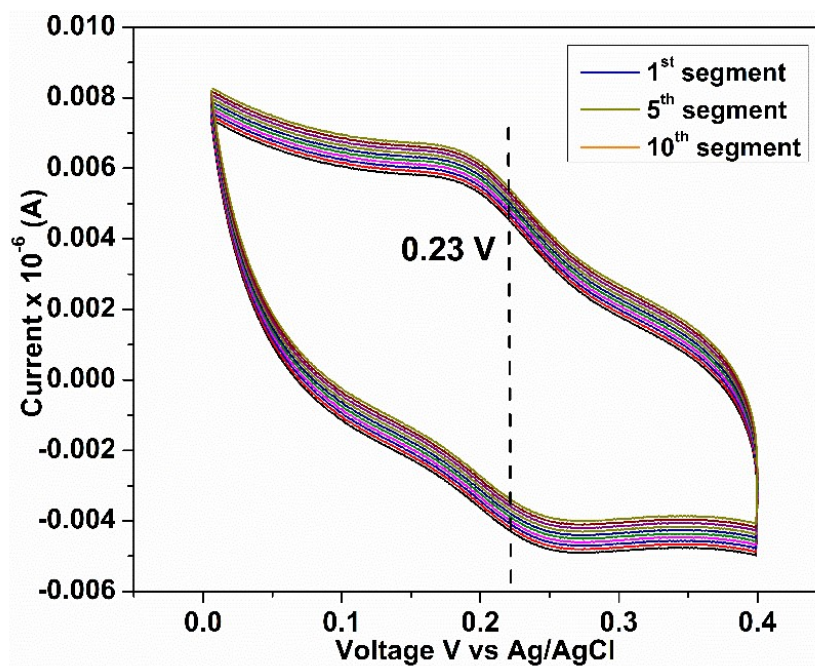

Figure .S-15. 10 segment oxidation Cyclic Voltammogram of Fe(II)-L<sub>2</sub> poly

## 8. Conductivity Experiment and Counter ion detection of Fe(II)-L<sub>1</sub> poly and Fe(II)-L<sub>2</sub> poly solutions

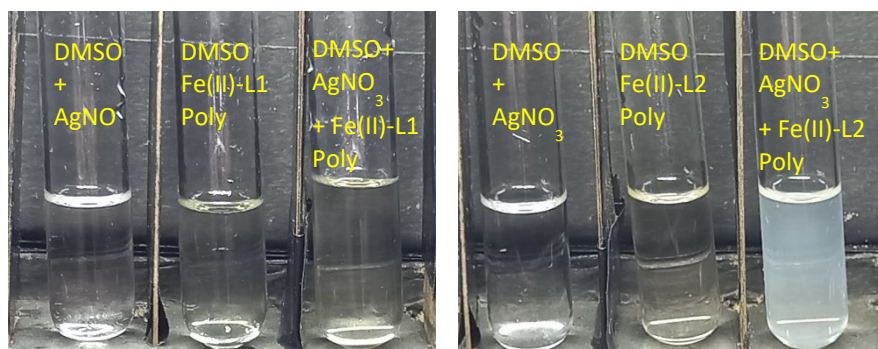

Figure .S-16. Counter ion detection of Fe(II)-L<sub>1</sub> poly and Fe(II)-L<sub>2</sub> poly solutions

Two experiments were conducted to verify the presence of Cl<sup>-</sup> counter anion; precipitation test by AgNO<sub>3</sub> followed by conductivity measurement experiment. A ubiquitous test used to detect Cl<sup>-</sup> ions in solution is the AgNO<sub>3</sub> test. On adding AgNO<sub>3</sub> solution to Fe(II)-L<sub>1</sub> Poly solution, no turbidity was observed, which indicates the absence of Cl<sup>-</sup> as counter anion indicating Fe(II)-L<sub>1</sub> poly as a neutral polymer; however, in the case of Fe(II)-L<sub>2</sub> poly, slight turbidity was observed (as shown in pic) on the addition of AgNO<sub>3</sub> which indicates the presence of Cl<sup>-</sup> as a counter anion. This test was also supported by conductivity measurement of different concentrations for both polymeric solutions (Table S-1 below). In the case of Fe(II)-L<sub>1</sub> poly, a minimal change in conductivity measurements was observed that indicates the polymer being neutral. In the case of Fe(II)-L<sub>2</sub> poly, conductivity change with change in concentration was high, which could only be possible because of counter Cl<sup>-</sup> anions. Secondly, for the same concentration of polymeric solutions conductivity difference was quite large, indicating the presence of Cl<sup>-</sup> counter anion for Fe(II)-L<sub>2</sub> poly.

**Table .S-1. Conductivity measurements of Fe(II)-L<sub>1</sub> and Fe(II)-L<sub>2</sub> Poly**

| Sr. No. | Concentration          | Conductivity (μS)<br>Fe(II)-L <sub>1</sub> Poly | Conductivity (μS)<br>Fe(II)-L <sub>2</sub> Poly |
|---------|------------------------|-------------------------------------------------|-------------------------------------------------|
| 1       | 1 x 10 <sup>-4</sup> M | 6.34                                            | 14.13                                           |
| 2       | 2 x 10 <sup>-4</sup> M | 7.35                                            | 17.07                                           |
| 3       | 3 x 10 <sup>-4</sup> M | 7.15                                            | 34.40                                           |
| 4       | 4 x 10 <sup>-4</sup> M | 7.77                                            | 43.42                                           |

## 9. DRS of Fe(II)-L<sub>1</sub> and Fe(II)-L<sub>2</sub> poly

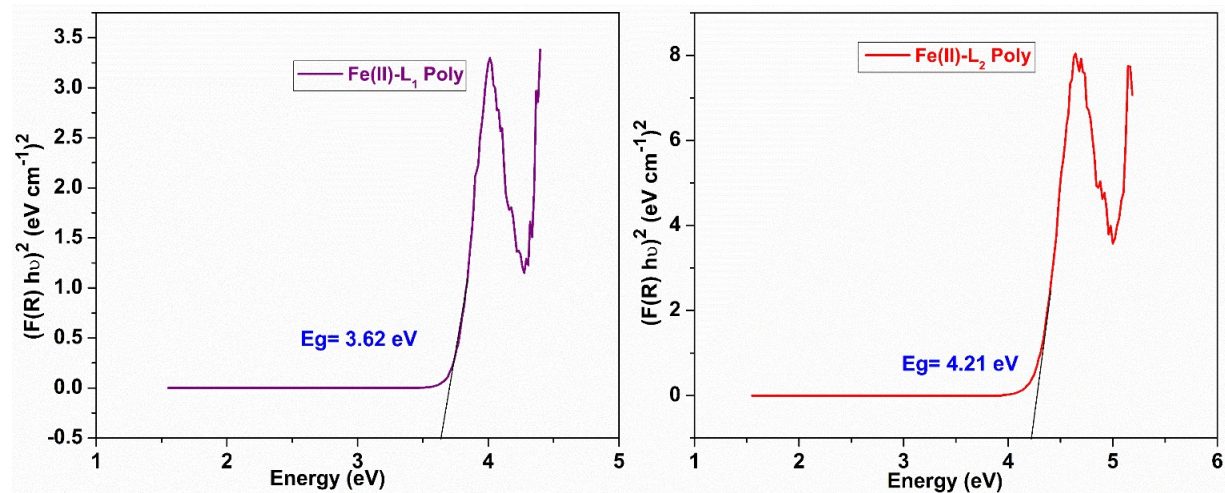

Figure .S-17. DRS of Fe(II)-L<sub>1</sub> poly and Fe(II)-L<sub>2</sub> poly

## 10. XPS of Fe(II)-L<sub>1</sub> and Fe(II)-L<sub>2</sub> poly

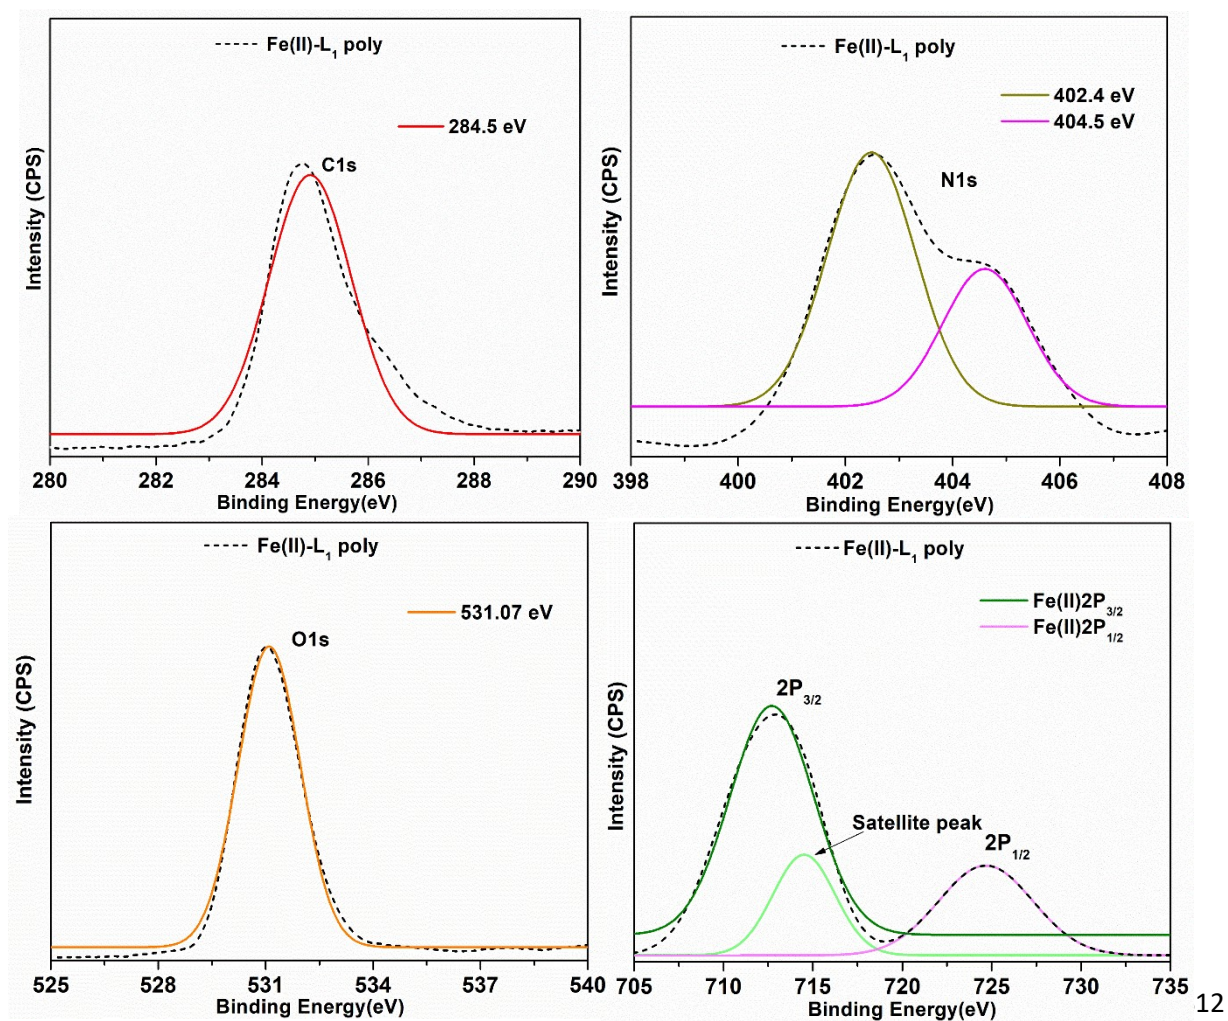

Figure .S-18. XPS of Fe(II)-L<sub>1</sub> poly of a) Carbon b) Nitrogen c) Oxygen and d) Iron element

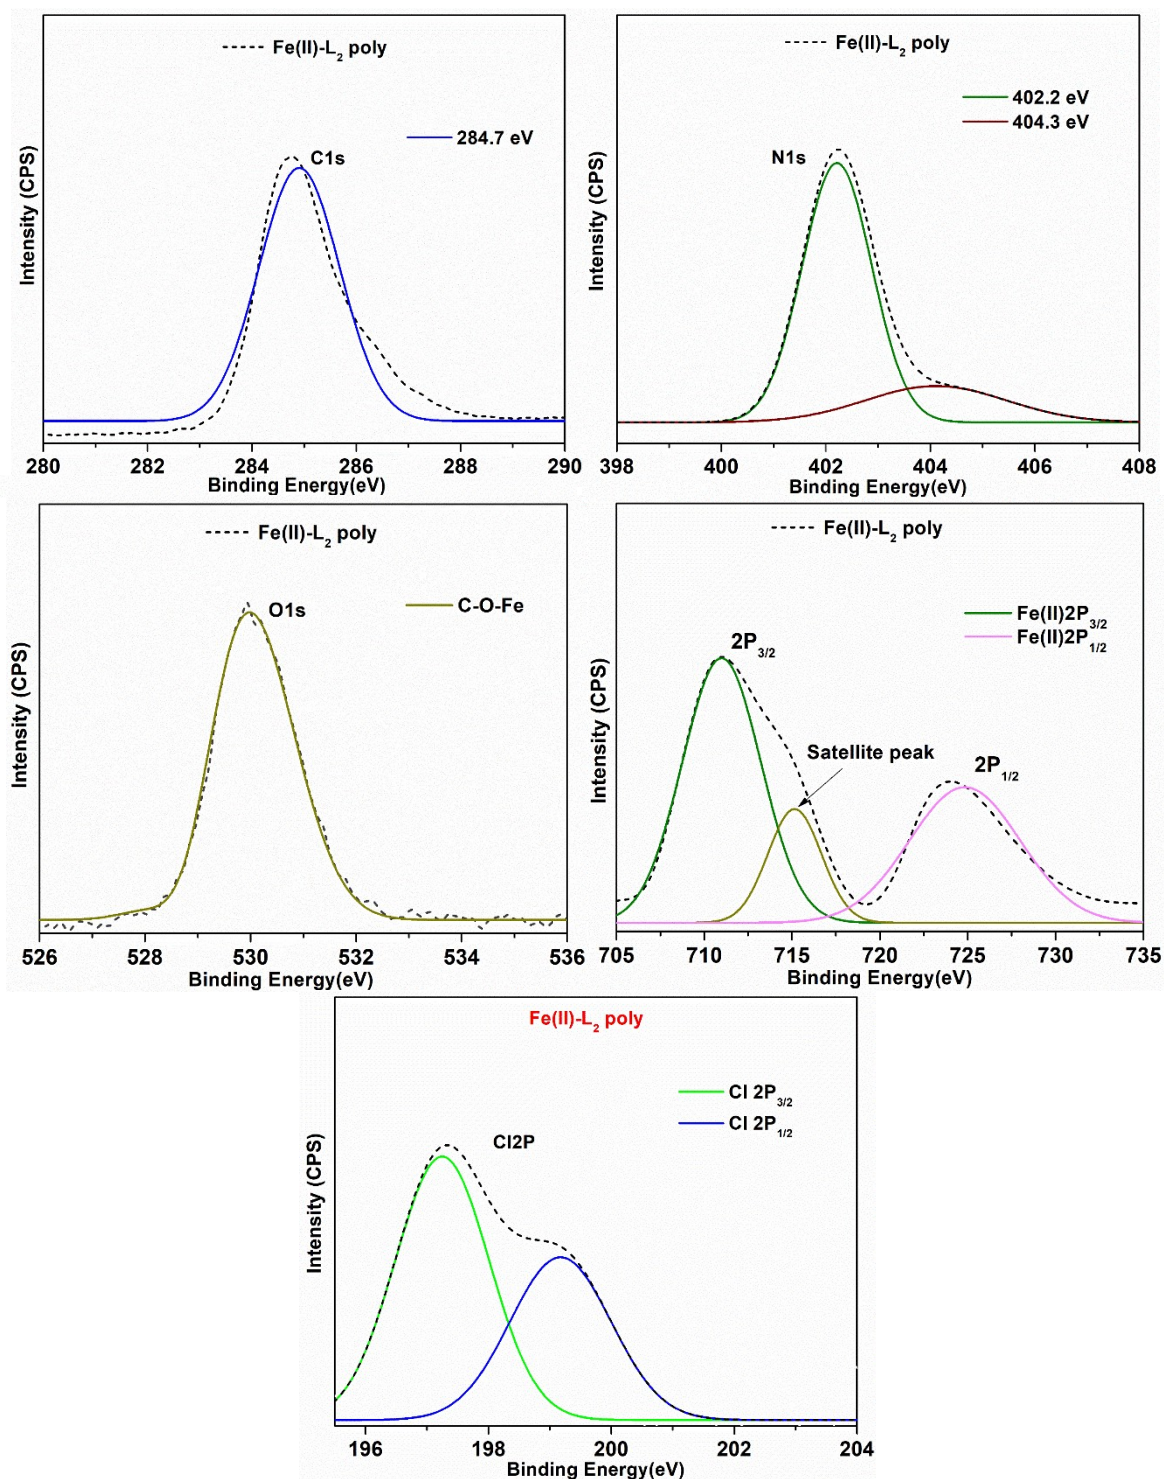

Figure .S-19. XPS of Fe(II)-L<sub>2</sub> poly of a) Carbon b) Nitrogen c) Oxygen d) Iron and e) Chlorine element

## 11. Spectroelectrochemical studies upon sequential voltage increase of Fe(II)-L<sub>1</sub> poly and Fe(II)-L<sub>2</sub> poly

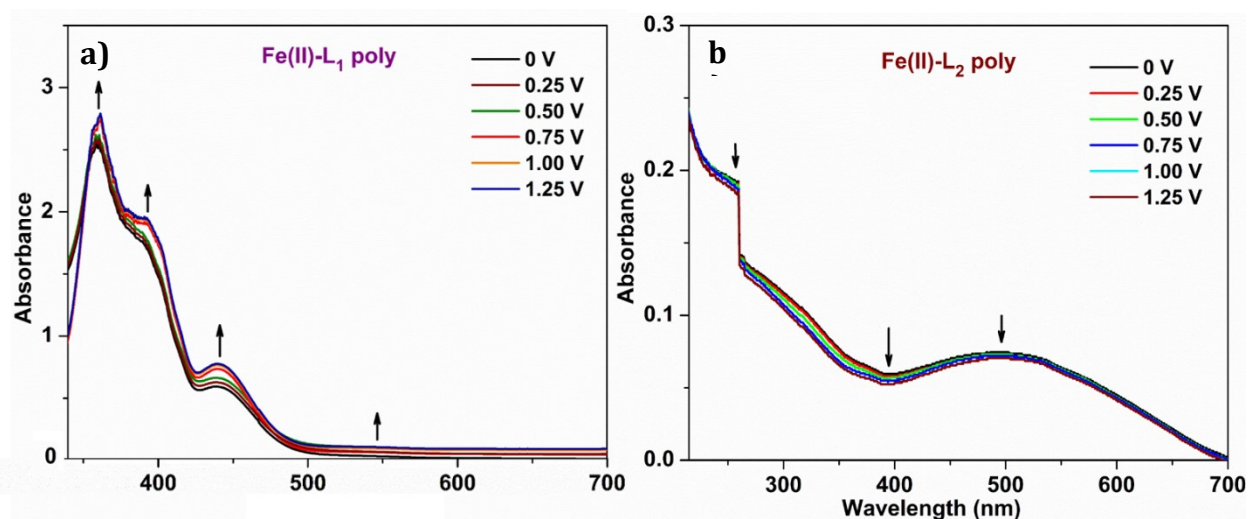

Figure S-20. Spectroelectrochemical experiment studies upon sequential voltage increase (a) Fe(II)-L<sub>1</sub> poly showing incremental changes in spectra in between 0 V to 0.9 V and (b) Fe(II)-L<sub>2</sub> poly showing a decrease in spectra in between 0 V to 0.9 V

## 12. Effect of mass loading and scan rate on capacitance value of Fe(II)-L<sub>1</sub> poly and Fe(II)-L<sub>2</sub> poly

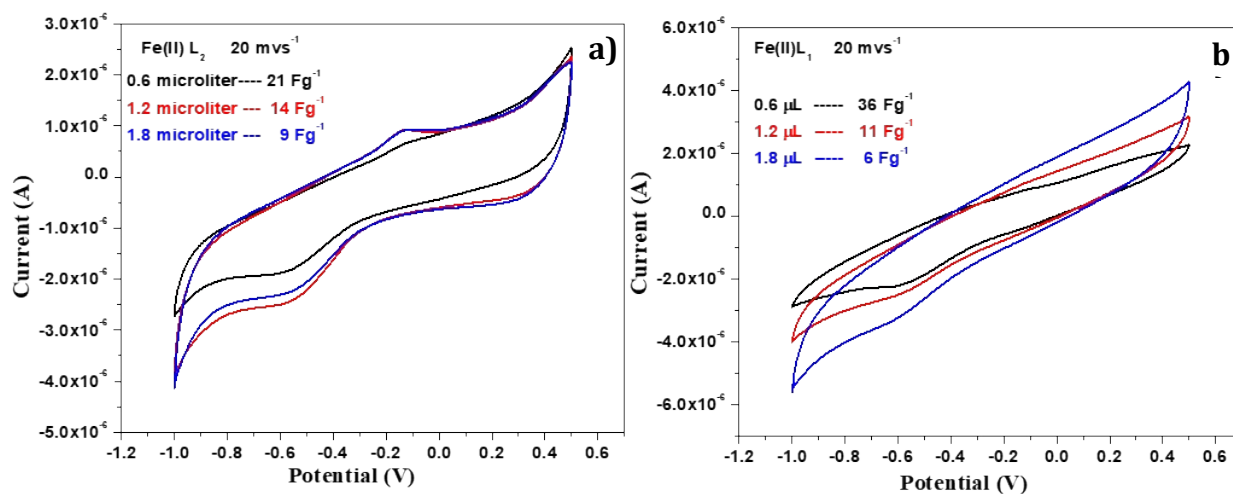

Figure S-21. Effect of mass loading and scan rate on capacitance value of Fe(II)-L<sub>1</sub> poly and Fe(II)-L<sub>2</sub> poly
